# Supplementary material for: Chemical vapor deposition synthesis of two-dimensional freestanding transition metal oxychloride for electronic applications
Source: Springer Nature journal article supplement (doi:10.1007/s11432-019-2653-9), 2019-11-12
Supplement: 11432_2019_2653_MOESM1_ESM.pdf [file 11432_2019_2653_MOESM1_ESM.pdf]

# Chemical Vapor Deposition Synthesis of Two-dimensional Freestanding Transition Metal Oxychloride for Electronic Applications

Shengnan Yan<sup>1</sup>, Pengfei Wang<sup>1</sup>, Chen-Yu Wang<sup>1</sup>, Tao Xu<sup>2</sup>, Zhuan Li<sup>1</sup>,  
Tianjun Cao<sup>1</sup>, Moyu Chen<sup>1</sup>, Chen Pan<sup>1</sup>, Bin Cheng<sup>1</sup>, Litao Sun<sup>2</sup>, Shi-Jun Liang<sup>1\*</sup> & Feng Miao<sup>1\*</sup>

<sup>1</sup>*National Laboratory of Solid State Microstructures, School of Physics, Collaborative Innovation Center of Advanced Microstructures,  
Nanjing University, Nanjing 210093, China;*

<sup>2</sup>*Key Laboratory of MEMS of Ministry of Education Southeast University Nanjing 210096, China*

---

\* Corresponding author (email: sjliang@nju.edu.cn, miao@nju.edu.cn)

Appendix A X-ray diffraction characterization of the reactants

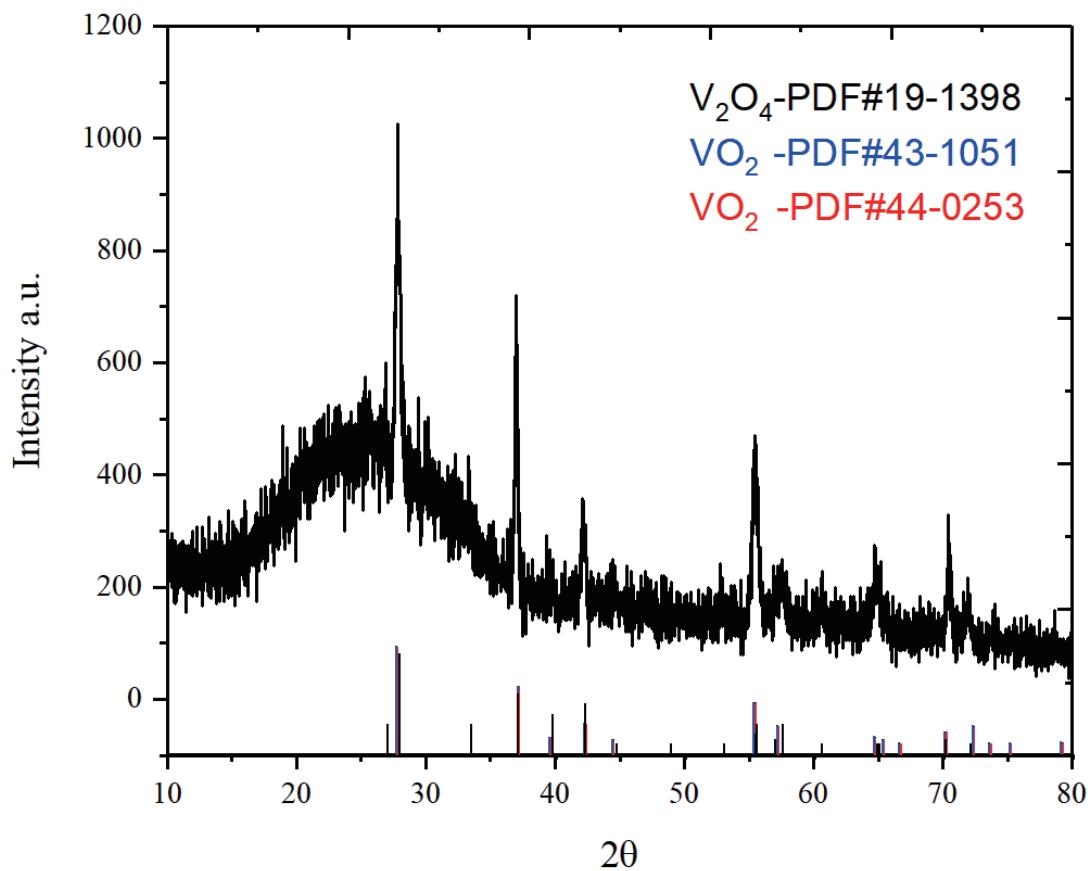

Figure A1 X-ray diffraction pattern of the reactants.

**Appendix B Atomic force microscopy characterization of as-grown VOCl flakes with various thickness.**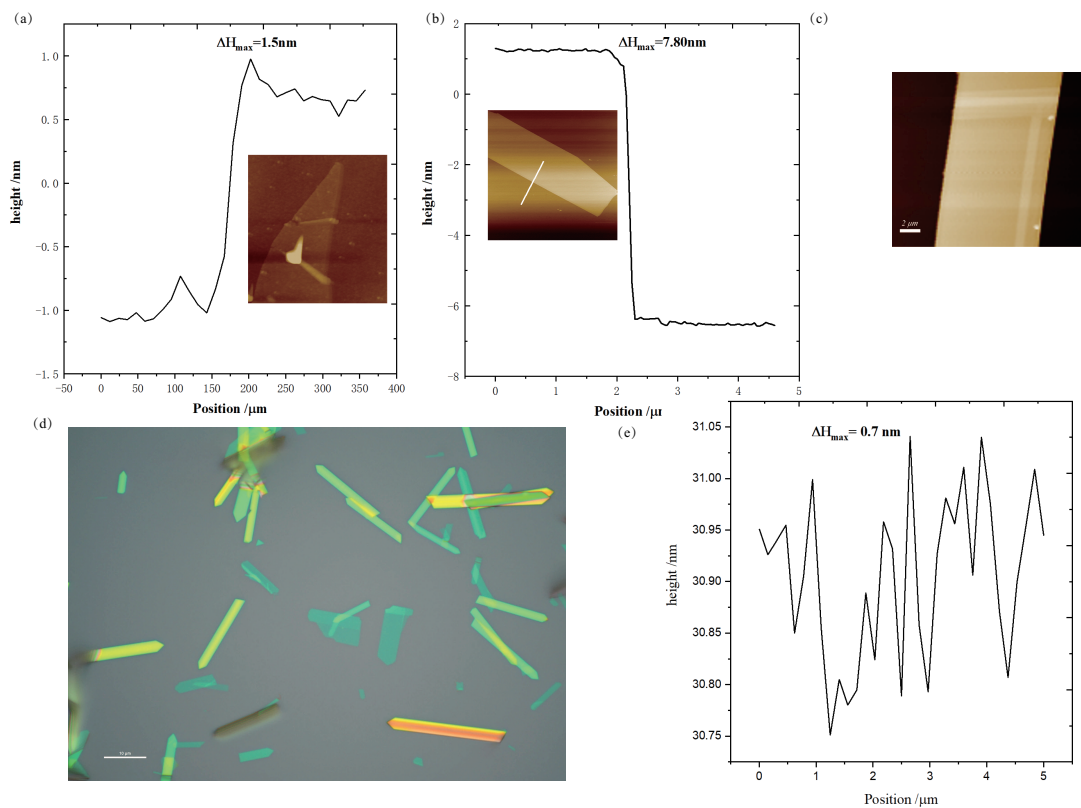

**Figure B1** (a), (b) & (c) AFM height profile of single crystals VOCl sample with 1.5, 7.8 & 57.5 nm, insets show corresponding AFM images; (d) optical images of various VOCl crystal, scale bar is 10 μm (e) surface roughness of VOCl crystal.

Appendix C Electrical characterizations of Au/VOCl/Au memristive devices

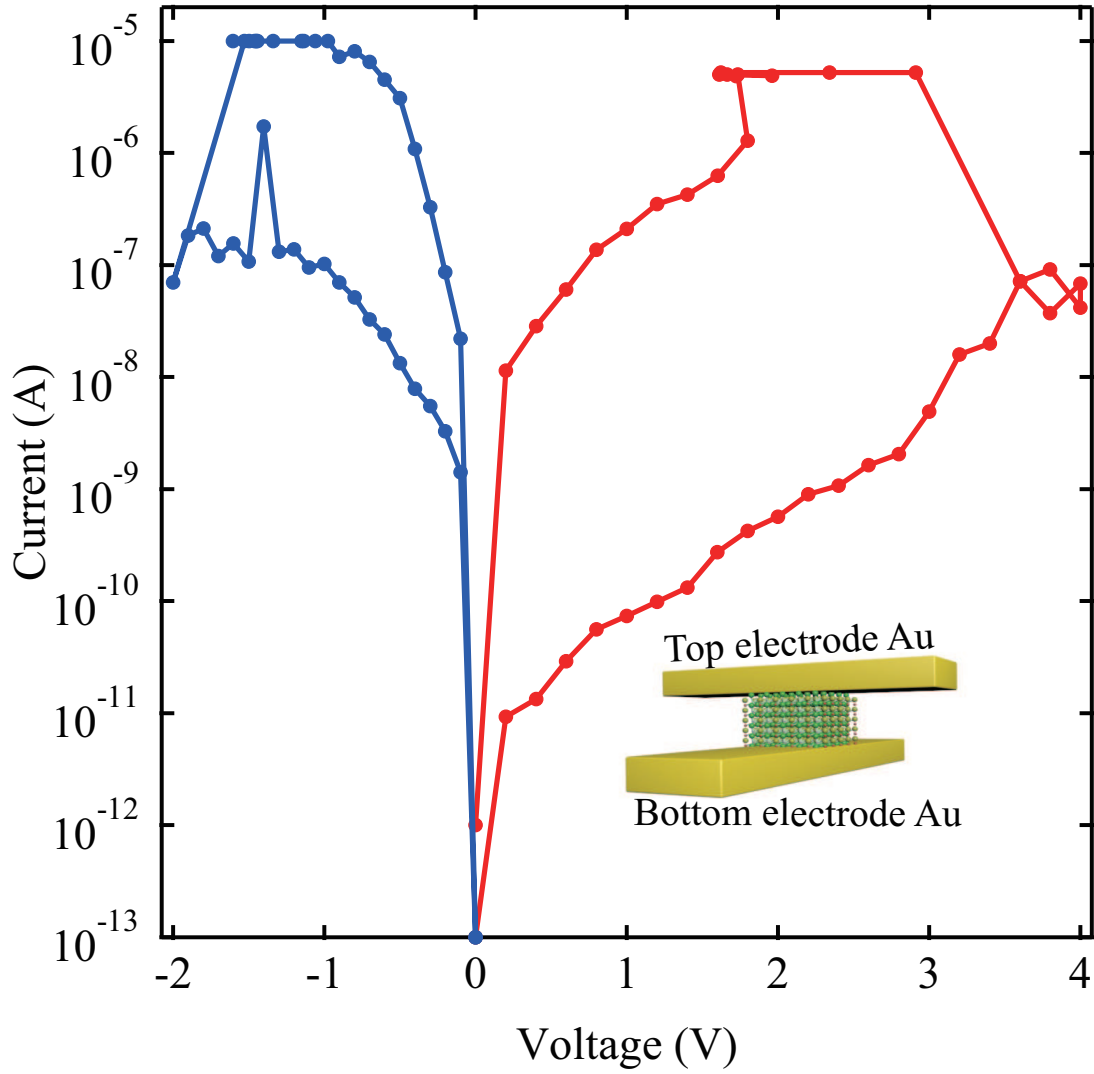

Figure C1 Typical I-V switching curve of Au/VOCl/Au memristive device.

Appendix D Switching variance of different VOCl based memristive devices.

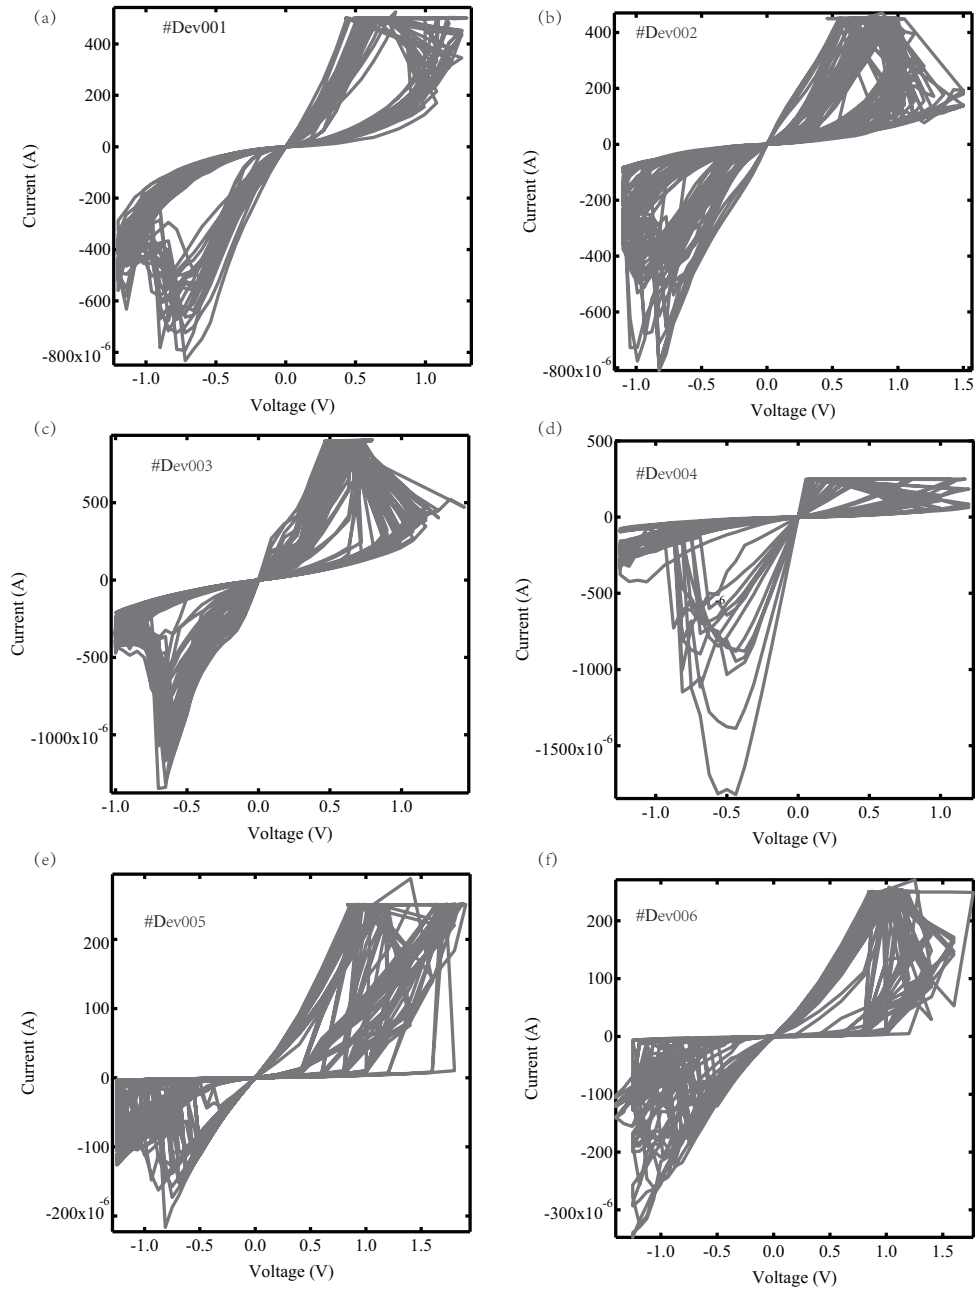

Figure D1 Switching curves of different VOCl-based memristive devices

Appendix E Switching curve of VOCl based memristive device

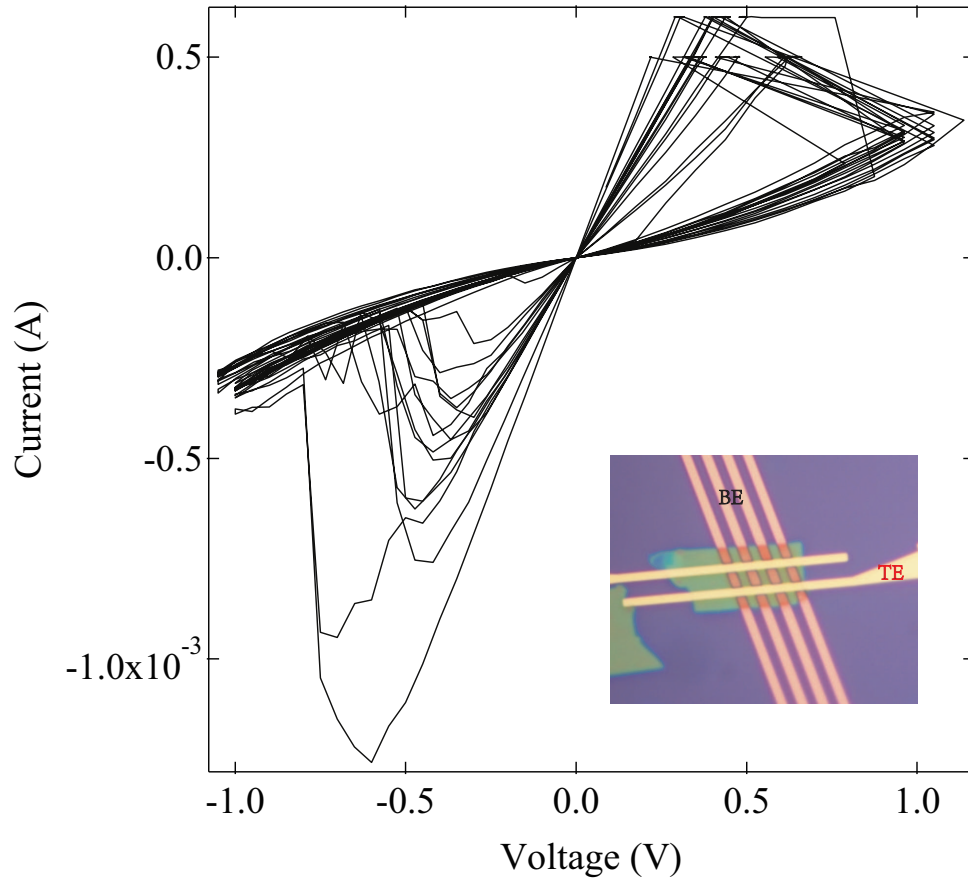

**Figure E1** Switching curve of VOCl based memristive device measured after three months. The inset show optical image of device (the same device used in figure 4f in the main manuscript).
